# Supplementary material
Source: PubMed Central journal article supplement (PMC2768578)

Supplemental Figure 1.

Supplemental figure 1. Stat5 phosphorylation in response to IL-2 stimulation requires Jak3.

CD4SP thymocytes from *Jak3<sup>+/-</sup>* and *Jak3<sup>-/-</sup>* OT-II Bcl-2 mice were purified, stimulated with anti-CD3 and anti-CD28 antibodies for 2 days, rested for 4 hours, then stimulated with IL-2 (50 ng/ml) for 15 minutes. Cell lysates were prepared and immunoblotted for pStat5 and Stat5.

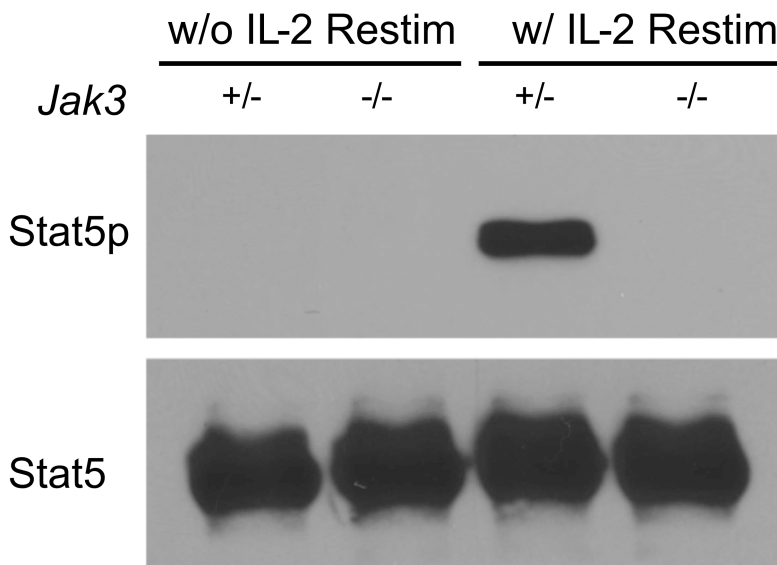

Supplement: NIHMS137123-supplement-1.pdf [file NIHMS137123-supplement-1.pdf]
